# Supplementary material
Source: Springer Nature journal article supplement (https://www.springermedizin.de/resource/supplementary/12885_2012_3687_MOESM3_ESM.pdf/9465934)
Supplement: MOESM3 [file 9465934]

Records identified through  
database searching  
(n = 8187)

Full-text articles assessed  
for eligibility  
(n = 801)

Duplicates (n = 2)  
Did not meet inclusion criteria (n=732):  
Not an RCT (n = 639)  
Not population of interest (n = 8)  
Not intervention of interest (n = 11)  
Not control of interest (n = 24)  
No outcome of interest (n = 9)  
Data for cancer subgroup not available (n = 33)  
Other reasons (n = 8)

Studies included in  
analysis  
(n = 67)
